# Supplementary material for: Time-Series Sensory Analysis Provided Important TI Parameters for Masking the Beany Flavor of Soymilk
Source: MDPI journal article supplement (doi:10.3390/foods12142752), 2023-07-19
Supplement: s1 [file s1]

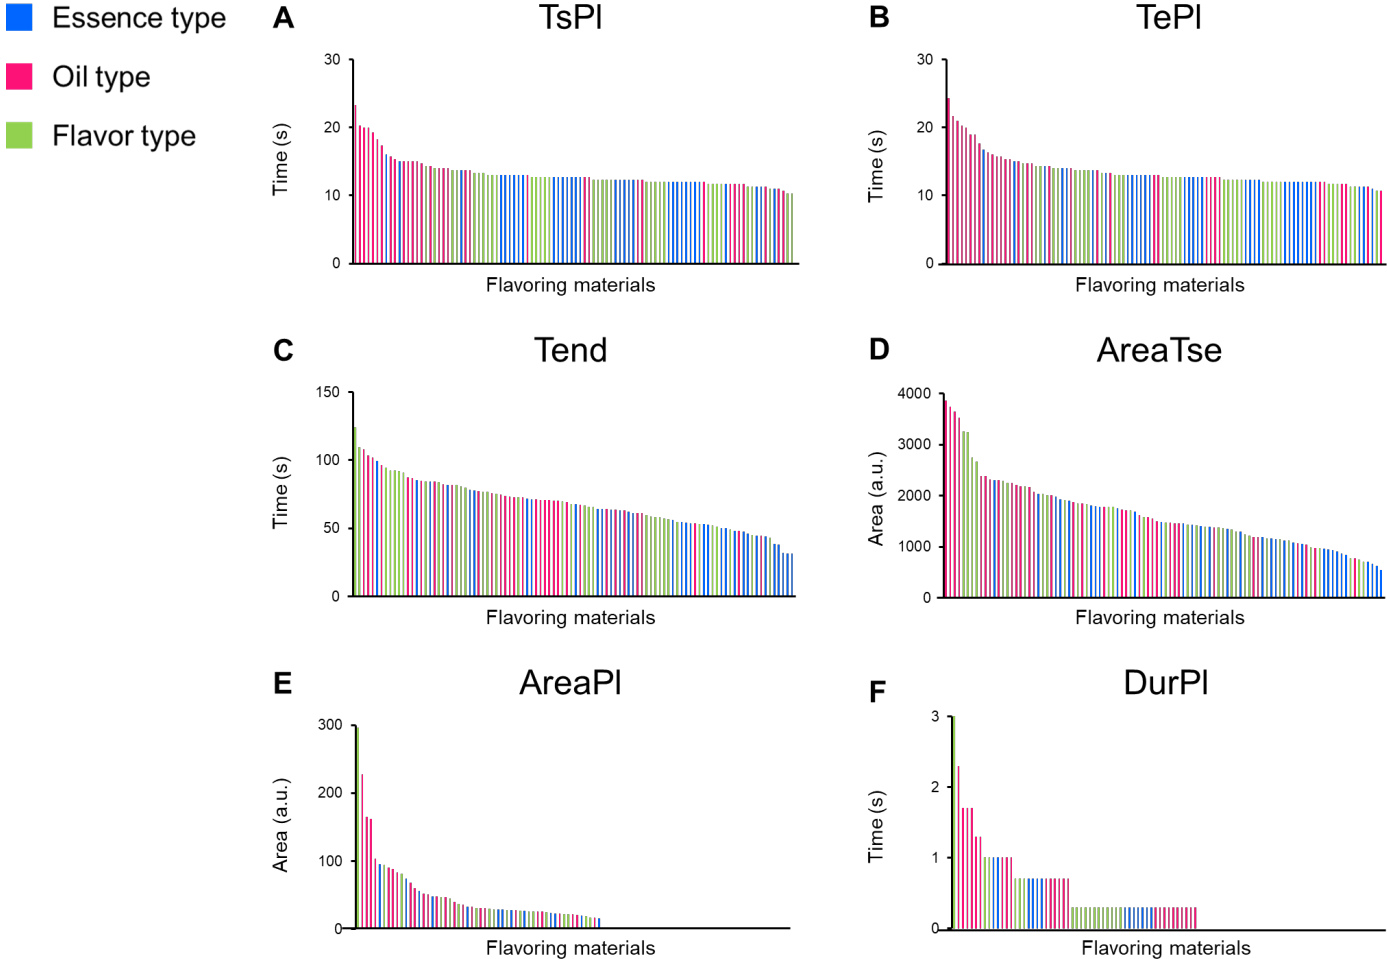

**Figure S1:** Six TI parameter values of the food-flavoring materials. The data values of the 100 flavor materials were arranged in descending order from left to right. The six TI parameters are as follows: (A) TsPI, (B) TePI, (C) Tend, (D) AreaTse, (E) AreaPI, and (F) DurPI. The colors of the bars indicate the material types: blue for essence type, magenta for oil type, and light green for flavor type. a.u. (arbitrary unit).
