# Supplementary material for: Time-Series Sensory Analysis Provided Important TI Parameters for Masking the Beany Flavor of Soymilk
Source: MDPI journal article supplement (doi:10.3390/foods12142752), 2023-07-19
Supplement: s1 [file s1]

**Table S1.** List of the 100 food-flavoring materials.

| No. | Essence type        | Notation      | Origin     | No. | Oil type                       | Notation                     | Origin     | No. | Flavor type               | Notation             | Origin     |
|-----|---------------------|---------------|------------|-----|--------------------------------|------------------------------|------------|-----|---------------------------|----------------------|------------|
| 1   | Apple essence       | Apple_e       | artificial | 34  | Apple oil                      | Apple_o                      | artificial | 67  | Apricot flavor            | Apricot_f            | artificial |
| 2   | Apricot essence     | Apricot_e     | artificial | 35  | Almond oil                     | Almond_o                     | artificial | 68  | Baked sweet potato flavor | Baked sweet potato_f | artificial |
| 3   | Banana essence      | Banana_e      | artificial | 36  | Banana oil                     | Banana_o                     | artificial | 69  | Brown sugar flavor        | Brown sugar_f        | artificial |
| 4   | Blueberry essence   | Blueberry_e   | artificial | 37  | Blueberry oil                  | Blueberry_o                  | artificial | 70  | Chocolate flavor          | Chocolate_f          | artificial |
| 5   | Brown sugar essence | Brown sugar_e | artificial | 38  | Caramel oil                    | Caramel_o                    | artificial | 71  | Cocoa flavor              | Cocoa_f              | artificial |
| 6   | Caramel essence     | Caramel_e     | artificial | 39  | Cheese oil                     | Cheese_o                     | artificial | 72  | Coconut flavor            | Coconut_f            | artificial |
| 7   | Cheese essence      | Cheese_e      | artificial | 40  | Cherry oil                     | Cherry_o                     | artificial | 73  | Coffee flavor             | Coffee_f             | artificial |
| 8   | Cherry tree essence | Cherry tree_e | artificial | 41  | Cinnamon oil                   | Cinnamon_o                   | artificial | 74  | Cola flavor               | Cola_f               | artificial |
| 9   | Chestnut essence    | Chestnut_e    | artificial | 42  | Coconut oil                    | Coconut_o                    | artificial | 75  | Custard flavor            | Custard_f            | artificial |
| 10  | Chocolate essence   | Chocolate_e   | artificial | 43  | Cola oil                       | Cola_o                       | artificial | 76  | Framboise flavor          | Framboise_f          | artificial |
| 11  | Cinnamon essence    | Cinnamon_e    | artificial | 44  | European pear oil              | European pear_o              | artificial | 77  | Herb flavor               | Herb_f               | artificial |
| 12  | Cocoa essence       | Cocoa_e       | artificial | 45  | Guava oil                      | Guava_o                      | artificial | 78  | Honey flavor              | Honey_f              | artificial |
| 13  | Cranberry essence   | Cranberry_e   | artificial | 46  | Hazelnut oil                   | Hazelnut_o                   | artificial | 79  | Kabosu flavor             | Kabosu_f             | artificial |
| 14  | Grapefruit essence  | Grapefruit_e  | artificial | 47  | Kiwifruit oil                  | Kiwifruit_o                  | artificial | 80  | Kyoho grape flavor        | Kyoho grape_f        | artificial |
| 15  | Honey essence       | Honey_e       | artificial | 48  | Liche oil                      | Liche_o                      | artificial | 81  | Lemon flavor              | Lemon_f              | artificial |
| 16  | Kiwifruit essence   | Kiwifruit_e   | artificial | 49  | Mango oil                      | Mango_o                      | artificial | 82  | Liche flavor              | Liche_f              | artificial |
| 17  | Kyoho grape essence | Kyoho grape_e | artificial | 50  | Melon oil                      | Melon_o                      | artificial | 83  | Maple flavor              | Maple_f              | artificial |
| 18  | Lemon essence       | Lemon_e       | artificial | 51  | Muscat oil                     | Muscat_o                     | artificial | 84  | Matcha flavor             | Matcha_f             | artificial |
| 19  | Liche essence       | Liche_e       | artificial | 52  | Orange essential oil           | Orange essential_o           | natural    | 85  | Melon flavor              | Melon_f              | artificial |
| 20  | Lime essence        | Lime_e        | artificial | 53  | Orange oil                     | Orange_o                     | artificial | 86  | Mixed fruit flavor        | Mixed fruit_f        | artificial |
| 21  | Mango essence       | Mango_e       | artificial | 54  | Peach oil                      | Peach_o                      | artificial | 87  | Muscat flavor             | Muscat_f             | artificial |
| 22  | Matcha essence      | Matcha_e      | artificial | 55  | Peppermint oil                 | Peppermint_o                 | artificial | 88  | Passion fruit flavor      | Passionfruit_f       | artificial |
| 23  | Melon essence       | Melon_e       | artificial | 56  | Pineapple oil                  | Pineapple_o                  | artificial | 89  | Peach flavor              | Peach_f              | artificial |
| 24  | Muscat essence      | Muscat_e      | artificial | 57  | Plum oil                       | Plum_o                       | artificial | 90  | Peanut flavor             | Peanut_f             | artificial |
| 25  | Orange essence      | Orange_e      | artificial | 58  | Raspberry oil                  | Raspberry_o                  | artificial | 91  | Peppermint flavor         | Peppermint_f         | artificial |
| 26  | Pineapple essence   | Pineapple_e   | artificial | 59  | Rose oil                       | Rose_o                       | artificial | 92  | Pineapple flavor          | Pineapple_f          | artificial |
| 27  | Raspberry essence   | Raspberry_e   | artificial | 60  | Satsuma mandarin essential oil | Satsuma mandarin essential_o | natural    | 93  | Plum flavor               | Plum_f               | artificial |
| 28  | Rose essence        | Rose_e        | artificial | 61  | Soda pop oil                   | Soda pop_o                   | artificial | 94  | Roasted green tea flavor  | Roasted green tea_f  | artificial |
| 29  | Spearmint essence   | Spearmint_e   | artificial | 62  | Strawberry oil                 | Strawberry_o                 | artificial | 95  | Spearmint flavor          | Spearmint_f          | artificial |
| 30  | Strawberry essence  | Strawberry_e  | artificial | 63  | Tea oil                        | Tea_o                        | artificial | 96  | Sudachi flavor            | Sudachi_f            | artificial |
| 31  | Tea essence         | Tea_e         | artificial | 64  | Vanilla oil                    | Vanilla_o                    | artificial | 97  | Vanilla flavor            | Vanilla_f            | artificial |
| 32  | Vanilla essence     | Vanilla_e     | artificial | 65  | Yogurt oil                     | Yogurt_o                     | artificial | 98  | White peach flavor        | White peach_f        | artificial |
| 33  | White peach essence | White peach_e | artificial | 66  | Yuzu essential oil             | Yuzu essential_o             | natural    | 99  | Yogurt flavor             | Yogurt_f             | artificial |
|     |                     |               |            |     |                                |                              |            | 100 | Yuzu flavor               | Yuzu_f               | artificial |

The names of the materials were denoted as flavor name\_type (e, o, or f) (e.g., apricot essence, almond oil, and brown sugar flavor were denoted as apricot\_e, almond\_o, and brown sugar\_f, respectively). The food-flavoring materials were classified as artificial, artificially blended; natural, extracted from natural products.

**Table S2.** Masking scores and TI profiles of the flavor materials.

| No. | Material name                | Masking score | Imax  | Tstart | Tend  | TsPI | TePI | DurPI | DurInc | DurDec | SIMInc | SIMDec | AreaTse | AreaInc | AreaDec | AreaPI |
|-----|------------------------------|---------------|-------|--------|-------|------|------|-------|--------|--------|--------|--------|---------|---------|---------|--------|
| 1   | Cinnamon_o                   | 9.9           | 82.00 | 2.0    | 63.3  | 11.7 | 11.7 | 0.0   | 9.7    | 51.7   | 27.87  | 6.69   | 1381    | 334     | 1047    | 0      |
| 2   | Peppermint_o                 | 9.9           | 99.00 | 2.0    | 64.0  | 11.7 | 13.3 | 1.7   | 9.7    | 50.7   | 44.62  | 4.05   | 2248    | 411     | 1672    | 165    |
| 3   | Orange essential_o           | 9.6           | 97.00 | 2.0    | 102.0 | 20.0 | 21.7 | 1.7   | 18.0   | 80.3   | 19.39  | 4.14   | 3650    | 1016    | 2472    | 162    |
| 4   | Herb_f                       | 9.5           | 98.67 | 2.0    | 92.0  | 10.3 | 13.3 | 3.0   | 8.3    | 78.7   | 17.63  | 10.18  | 3246    | 436     | 2514    | 296    |
| 5   | Pineapple_o                  | 9.3           | 75.33 | 2.0    | 82.3  | 12.7 | 12.7 | 0.0   | 10.7   | 69.7   | 15.99  | 3.28   | 2075    | 312     | 1763    | 0      |
| 6   | Rose_o                       | 9.3           | 97.67 | 2.0    | 108.0 | 15.3 | 17.7 | 2.3   | 13.3   | 90.3   | 16.58  | 5.02   | 3738    | 597     | 2913    | 228    |
| 7   | Yuzu essential_o             | 9.3           | 78.67 | 2.0    | 73.3  | 20.3 | 21.0 | 0.7   | 18.3   | 52.3   | 6.04   | 4.67   | 2004    | 644     | 1307    | 52     |
| 8   | Coffee_f                     | 9.2           | 70.33 | 2.3    | 91.0  | 13.3 | 14.0 | 0.7   | 11.0   | 77.0   | 18.08  | 3.23   | 2183    | 357     | 1779    | 47     |
| 9   | Rose_e                       | 9.2           | 60.67 | 2.0    | 53.0  | 11.3 | 11.3 | 0.0   | 9.3    | 41.7   | 21.93  | 5.24   | 943     | 230     | 713     | 0      |
| 10  | Cheese_o                     | 9.1           | 91.67 | 2.0    | 71.3  | 11.7 | 12.0 | 0.3   | 9.7    | 59.3   | 21.93  | 6.75   | 1880    | 405     | 1445    | 31     |
| 11  | Pineapple_f                  | 9.0           | 80.33 | 2.0    | 43.0  | 11.3 | 11.7 | 0.3   | 9.3    | 31.3   | 31.17  | 11.21  | 989     | 332     | 630     | 27     |
| 12  | Banana_e                     | 9.0           | 78.67 | 2.0    | 84.3  | 12.0 | 12.0 | 0.0   | 10.0   | 72.3   | 19.44  | 3.04   | 2034    | 351     | 1684    | 0      |
| 13  | Caramel_e                    | 9.0           | 56.00 | 2.0    | 38.0  | 12.3 | 12.3 | 0.0   | 10.3   | 25.7   | 13.85  | 5.94   | 702     | 218     | 484     | 0      |
| 14  | Cheese_e                     | 9.0           | 76.00 | 2.0    | 31.3  | 11.3 | 11.3 | 0.0   | 9.3    | 20.0   | 21.16  | 8.43   | 848     | 296     | 552     | 0      |
| 15  | Cherry_o                     | 9.0           | 99.00 | 2.0    | 87.0  | 15.7 | 16.0 | 0.3   | 13.7   | 71.0   | 21.80  | 3.19   | 3521    | 735     | 2754    | 33     |
| 16  | Yogurt_o                     | 8.9           | 69.00 | 2.0    | 70.7  | 13.7 | 13.7 | 0.0   | 11.7   | 57.0   | 16.39  | 3.34   | 1549    | 387     | 1162    | 0      |
| 17  | Plum_f                       | 8.8           | 83.67 | 2.0    | 109.7 | 11.7 | 12.0 | 0.3   | 9.7    | 97.7   | 18.97  | 3.81   | 2742    | 360     | 2355    | 28     |
| 18  | Liche_f                      | 8.8           | 90.33 | 2.0    | 66.0  | 11.0 | 11.3 | 0.3   | 9.0    | 54.7   | 25.76  | 5.93   | 1854    | 340     | 1484    | 30     |
| 19  | Strawberry_e                 | 8.7           | 66.67 | 2.0    | 54.7  | 12.3 | 12.3 | 0.0   | 10.3   | 42.3   | 15.09  | 4.84   | 1127    | 313     | 814     | 0      |
| 20  | Brown sugar_e                | 8.7           | 59.33 | 2.0    | 85.3  | 12.0 | 12.0 | 0.0   | 10.0   | 73.3   | 17.61  | 3.66   | 1426    | 213     | 1213    | 0      |
| 21  | Matcha_e                     | 8.7           | 73.00 | 2.0    | 99.7  | 12.0 | 12.0 | 0.0   | 10.0   | 87.7   | 19.22  | 3.15   | 2301    | 294     | 2007    | 0      |
| 22  | Caramel_o                    | 8.7           | 68.00 | 2.0    | 69.3  | 11.3 | 12.7 | 1.3   | 9.3    | 56.7   | 15.77  | 5.15   | 1462    | 272     | 1100    | 91     |
| 23  | Hazelnut_o                   | 8.7           | 72.00 | 2.0    | 44.7  | 10.7 | 10.7 | 0.0   | 8.7    | 34.0   | 26.46  | 5.35   | 976     | 241     | 734     | 0      |
| 24  | Guava_o                      | 8.7           | 65.67 | 2.0    | 70.3  | 12.3 | 12.7 | 0.3   | 10.3   | 57.7   | 11.92  | 2.70   | 1464    | 257     | 1184    | 22     |
| 25  | Melon_f                      | 8.5           | 93.00 | 2.0    | 84.3  | 13.0 | 13.0 | 0.0   | 11.0   | 71.3   | 16.20  | 8.38   | 2013    | 472     | 1541    | 0      |
| 26  | Roasted green tea_f          | 8.5           | 85.00 | 2.3    | 67.7  | 13.7 | 13.7 | 0.0   | 11.3   | 54.0   | 25.40  | 7.50   | 1784    | 478     | 1306    | 0      |
| 27  | Almond_o                     | 8.5           | 85.00 | 1.7    | 70.7  | 13.7 | 14.0 | 0.3   | 12.0   | 56.7   | 22.73  | 2.74   | 2190    | 497     | 1665    | 28     |
| 28  | Yogurt_f                     | 8.4           | 92.00 | 2.0    | 76.7  | 14.3 | 14.7 | 0.3   | 12.3   | 62.0   | 16.30  | 5.14   | 2291    | 527     | 1733    | 31     |
| 29  | Tea_e                        | 8.4           | 82.00 | 2.0    | 72.0  | 12.7 | 13.0 | 0.3   | 10.7   | 59.0   | 24.71  | 5.90   | 1791    | 373     | 1391    | 27     |
| 30  | Satsuma mandarin essential_o | 8.4           | 89.00 | 2.0    | 103.3 | 23.3 | 24.3 | 1.0   | 21.3   | 79.0   | 8.15   | 2.27   | 3867    | 919     | 2859    | 89     |
| 31  | Matcha_f                     | 8.2           | 72.67 | 2.3    | 81.7  | 11.7 | 11.7 | 0.0   | 9.3    | 70.0   | 18.17  | 3.90   | 1473    | 265     | 1208    | 0      |
| 32  | Honey_e                      | 8.2           | 55.00 | 2.3    | 44.0  | 11.0 | 11.0 | 0.0   | 8.7    | 33.0   | 18.58  | 7.46   | 623     | 209     | 414     | 0      |
| 33  | Mango_e                      | 8.1           | 74.00 | 1.5    | 78.5  | 13.0 | 14.0 | 1.0   | 11.5   | 64.5   | 19.61  | 4.33   | 1749    | 363     | 1312    | 74     |
| 34  | Blueberry_e                  | 8.1           | 63.00 | 2.0    | 48.3  | 12.0 | 12.0 | 0.0   | 10.0   | 36.3   | 21.23  | 5.60   | 963     | 269     | 695     | 0      |
| 35  | Cola_o                       | 8.1           | 60.00 | 2.0    | 70.3  | 14.0 | 14.7 | 0.7   | 12.0   | 55.7   | 8.96   | 3.03   | 1581    | 315     | 1226    | 40     |
| 36  | Orange_o                     | 8.0           | 76.67 | 2.3    | 84.3  | 19.3 | 20.0 | 0.7   | 17.0   | 64.3   | 19.30  | 3.51   | 2313    | 765     | 1496    | 51     |
| 37  | Spearmint_f                  | 7.9           | 81.33 | 1.7    | 69.7  | 12.0 | 12.0 | 0.0   | 10.3   | 57.7   | 22.51  | 5.00   | 1586    | 344     | 1243    | 0      |

|    |                      |     |       |     |       |      |      |     |      |       |       |       |      |     |      |     |
|----|----------------------|-----|-------|-----|-------|------|------|-----|------|-------|-------|-------|------|-----|------|-----|
| 38 | Muscat_f             | 7.9 | 81.00 | 2.0 | 80.0  | 13.0 | 14.0 | 1.0 | 11.0 | 66.0  | 13.91 | 3.79  | 2030 | 436 | 1514 | 81  |
| 39 | Cola_f               | 7.9 | 60.67 | 2.0 | 72.7  | 13.7 | 13.7 | 0.0 | 11.7 | 59.0  | 14.74 | 3.42  | 1218 | 303 | 915  | 0   |
| 40 | Orange_e             | 7.9 | 49.33 | 2.0 | 47.7  | 16.0 | 16.7 | 0.7 | 14.0 | 31.0  | 7.29  | 2.94  | 913  | 286 | 594  | 33  |
| 41 | Grapefruit_e         | 7.9 | 83.33 | 2.0 | 64.3  | 12.7 | 12.7 | 0.0 | 10.7 | 51.7  | 19.73 | 2.97  | 1981 | 356 | 1625 | 0   |
| 42 | Melon_o              | 7.9 | 70.00 | 2.0 | 96.7  | 15.0 | 15.3 | 0.3 | 13.0 | 81.3  | 14.55 | 3.34  | 2299 | 428 | 1848 | 23  |
| 43 | Kyoho grape_e        | 7.8 | 70.67 | 2.0 | 71.3  | 12.3 | 12.7 | 0.3 | 10.3 | 58.7  | 15.82 | 5.28  | 1404 | 306 | 1075 | 24  |
| 44 | Mango_o              | 7.8 | 93.00 | 2.0 | 82.0  | 15.0 | 15.3 | 0.3 | 13.0 | 66.7  | 17.98 | 6.16  | 2380 | 595 | 1754 | 31  |
| 45 | Coconut_o            | 7.8 | 79.00 | 2.0 | 85.0  | 20.0 | 20.3 | 0.3 | 18.0 | 64.7  | 18.41 | 4.14  | 2206 | 776 | 1404 | 26  |
| 46 | Kiwifruit_o          | 7.8 | 72.33 | 2.0 | 63.7  | 14.0 | 14.7 | 0.7 | 12.0 | 49.0  | 20.81 | 2.98  | 1732 | 416 | 1268 | 48  |
| 47 | Spearmint_e          | 7.7 | 95.67 | 2.0 | 53.7  | 13.0 | 14.0 | 1.0 | 11.0 | 39.7  | 11.48 | 5.47  | 1896 | 489 | 1311 | 96  |
| 48 | Vanilla_o            | 7.7 | 79.33 | 2.3 | 61.0  | 14.3 | 14.3 | 0.0 | 12.0 | 46.7  | 19.12 | 4.48  | 1849 | 443 | 1406 | 0   |
| 49 | Kiwifruit_e          | 7.5 | 72.33 | 2.0 | 77.7  | 15.0 | 15.0 | 0.0 | 13.0 | 62.7  | 13.82 | 3.28  | 1785 | 413 | 1372 | 0   |
| 50 | Peach_o              | 7.5 | 50.67 | 2.3 | 61.0  | 12.7 | 13.0 | 0.3 | 10.3 | 48.0  | 10.34 | 2.34  | 1076 | 207 | 853  | 17  |
| 51 | Tea_o                | 7.5 | 64.33 | 2.0 | 73.7  | 12.3 | 12.7 | 0.3 | 10.3 | 61.0  | 16.98 | 7.12  | 1197 | 273 | 903  | 21  |
| 52 | Vanilla_f            | 7.3 | 74.00 | 2.0 | 75.3  | 12.3 | 12.3 | 0.0 | 10.3 | 63.0  | 18.99 | 4.33  | 1717 | 339 | 1377 | 0   |
| 53 | Apricot_e            | 7.3 | 84.33 | 1.7 | 63.7  | 12.7 | 13.0 | 0.3 | 11.0 | 50.7  | 25.18 | 4.85  | 1691 | 392 | 1271 | 28  |
| 54 | White peach_f        | 7.2 | 57.00 | 2.0 | 45.3  | 12.0 | 12.0 | 0.0 | 10.0 | 33.3  | 12.07 | 6.34  | 742  | 228 | 515  | 0   |
| 55 | Muscat_e             | 7.1 | 87.00 | 2.3 | 82.0  | 12.0 | 12.0 | 0.0 | 9.7  | 70.0  | 31.48 | 6.67  | 1928 | 370 | 1558 | 0   |
| 56 | Banana_o             | 7.1 | 62.67 | 2.0 | 75.0  | 17.3 | 19.0 | 1.7 | 15.3 | 56.0  | 10.38 | 4.64  | 1616 | 482 | 1030 | 104 |
| 57 | Maple_f              | 7.0 | 95.00 | 2.0 | 124.0 | 13.3 | 14.3 | 1.0 | 11.3 | 109.7 | 22.40 | 2.93  | 3257 | 563 | 2600 | 95  |
| 58 | Cranberry_e          | 7.0 | 87.00 | 2.0 | 38.7  | 13.0 | 13.0 | 0.0 | 11.0 | 25.7  | 27.70 | 12.72 | 1080 | 387 | 693  | 0   |
| 59 | Raspberry_e          | 7.0 | 64.33 | 2.0 | 64.3  | 12.3 | 12.3 | 0.0 | 10.3 | 52.0  | 20.75 | 3.25  | 1395 | 289 | 1106 | 0   |
| 60 | Melon_e              | 6.9 | 82.67 | 1.7 | 62.3  | 12.0 | 12.0 | 0.0 | 10.3 | 50.3  | 16.35 | 13.44 | 1194 | 397 | 797  | 0   |
| 61 | Vanilla_e            | 6.9 | 43.67 | 2.7 | 61.3  | 13.0 | 13.7 | 0.7 | 10.3 | 47.7  | 10.87 | 1.70  | 1051 | 188 | 835  | 29  |
| 62 | Muscat_o             | 6.9 | 79.33 | 2.0 | 73.0  | 11.0 | 11.3 | 0.3 | 9.0  | 61.7  | 28.45 | 3.98  | 1718 | 275 | 1416 | 26  |
| 63 | Coconut_f            | 6.8 | 77.00 | 2.7 | 92.3  | 12.7 | 13.0 | 0.3 | 10.0 | 79.3  | 21.48 | 2.68  | 2257 | 319 | 1912 | 26  |
| 64 | Apricot_f            | 6.8 | 76.00 | 2.0 | 58.0  | 12.0 | 12.3 | 0.3 | 10.0 | 45.7  | 37.40 | 4.93  | 1362 | 327 | 1010 | 25  |
| 65 | Strawberry_o         | 6.8 | 54.00 | 2.0 | 53.7  | 15.0 | 15.7 | 0.7 | 13.0 | 38.0  | 7.98  | 2.53  | 1197 | 303 | 858  | 36  |
| 66 | Yuzu_f               | 6.7 | 75.00 | 2.3 | 52.3  | 12.3 | 12.3 | 0.0 | 10.0 | 40.0  | 18.30 | 4.79  | 1251 | 290 | 960  | 0   |
| 67 | Peppermint_f         | 6.7 | 66.33 | 2.3 | 54.7  | 14.0 | 14.3 | 0.3 | 11.7 | 40.3  | 15.63 | 3.36  | 1397 | 318 | 1056 | 22  |
| 68 | Honey_f              | 6.6 | 50.33 | 2.0 | 51.0  | 10.3 | 10.7 | 0.3 | 8.3  | 40.3  | 19.42 | 3.56  | 702  | 147 | 539  | 17  |
| 69 | Liche_e              | 6.6 | 86.67 | 2.0 | 50.3  | 12.7 | 13.0 | 0.3 | 10.7 | 37.3  | 24.36 | 16.19 | 1299 | 435 | 836  | 29  |
| 70 | Pineapple_e          | 6.5 | 59.00 | 2.3 | 32.0  | 13.0 | 13.3 | 0.3 | 10.7 | 18.7  | 14.56 | 6.20  | 663  | 264 | 380  | 20  |
| 71 | Peanut_f             | 6.4 | 85.67 | 2.0 | 77.0  | 11.7 | 12.0 | 0.3 | 9.7  | 65.0  | 24.91 | 3.60  | 1911 | 377 | 1505 | 29  |
| 72 | Cinnamon_e           | 6.4 | 72.33 | 2.0 | 44.7  | 13.0 | 13.0 | 0.0 | 11.0 | 31.7  | 19.46 | 4.72  | 1148 | 316 | 832  | 0   |
| 73 | European pear_o      | 6.3 | 67.67 | 2.0 | 87.3  | 14.0 | 15.0 | 1.0 | 12.0 | 72.3  | 19.99 | 2.69  | 2176 | 386 | 1722 | 68  |
| 74 | Plum_o               | 6.1 | 63.33 | 2.0 | 75.7  | 15.0 | 16.3 | 1.3 | 13.0 | 59.3  | 10.18 | 3.01  | 1785 | 355 | 1346 | 84  |
| 75 | Soda pop_o           | 5.9 | 59.67 | 2.0 | 77.3  | 14.7 | 15.7 | 1.0 | 12.7 | 61.7  | 10.82 | 2.97  | 1496 | 267 | 1169 | 60  |
| 76 | Peach_f              | 5.8 | 56.00 | 2.3 | 57.0  | 13.0 | 13.7 | 0.7 | 10.7 | 43.3  | 12.52 | 2.71  | 1170 | 253 | 880  | 37  |
| 77 | Passionfruit_f       | 5.8 | 63.00 | 2.0 | 94.3  | 12.7 | 12.7 | 0.0 | 10.7 | 81.7  | 18.34 | 1.96  | 1836 | 270 | 1567 | 0   |
| 78 | Chestnut_e           | 5.8 | 71.33 | 2.0 | 56.0  | 13.7 | 14.3 | 0.7 | 11.7 | 41.7  | 15.90 | 4.18  | 1460 | 339 | 1074 | 48  |
| 79 | Liche_o              | 5.7 | 68.67 | 2.0 | 71.0  | 13.0 | 13.0 | 0.0 | 11.0 | 58.0  | 20.17 | 5.23  | 1468 | 322 | 1146 | 0   |
| 80 | Lime_e               | 5.4 | 52.33 | 2.0 | 46.0  | 12.3 | 12.3 | 0.0 | 10.3 | 33.7  | 15.59 | 2.82  | 870  | 224 | 646  | 0   |
| 81 | Cocoa_f              | 5.2 | 75.33 | 2.0 | 83.7  | 12.7 | 12.7 | 0.0 | 10.7 | 71.0  | 16.28 | 2.72  | 1775 | 312 | 1463 | 0   |
| 82 | Baked sweet potato_f | 5.0 | 65.67 | 2.0 | 58.7  | 12.0 | 12.0 | 0.0 | 10.0 | 46.7  | 24.94 | 4.63  | 1120 | 281 | 839  | 0   |

|     |               |     |       |     |      |      |      |     |      |      |       |       |      |     |      |    |
|-----|---------------|-----|-------|-----|------|------|------|-----|------|------|-------|-------|------|-----|------|----|
| 83  | Chocolate_f   | 4.9 | 65.67 | 2.3 | 66.7 | 12.0 | 12.3 | 0.3 | 9.7  | 54.3 | 19.26 | 3.66  | 1333 | 226 | 1085 | 22 |
| 84  | Custard_f     | 4.8 | 67.67 | 2.3 | 92.3 | 12.3 | 13.0 | 0.7 | 10.0 | 79.3 | 18.43 | 2.17  | 2670 | 286 | 2339 | 45 |
| 85  | Blueberry_o   | 4.8 | 55.00 | 2.0 | 67.3 | 12.0 | 12.0 | 0.0 | 10.0 | 55.3 | 11.92 | 4.11  | 1039 | 210 | 829  | 0  |
| 86  | Chocolate_e   | 4.6 | 67.33 | 2.0 | 63.3 | 12.7 | 12.7 | 0.0 | 10.7 | 50.7 | 25.96 | 2.58  | 1492 | 317 | 1174 | 0  |
| 87  | Mixed fruit_f | 4.4 | 57.00 | 2.0 | 53.0 | 11.7 | 11.7 | 0.0 | 9.7  | 41.3 | 15.14 | 3.30  | 975  | 214 | 761  | 0  |
| 88  | Brown sugar_f | 4.4 | 49.67 | 2.0 | 49.3 | 12.7 | 12.7 | 0.0 | 10.7 | 36.7 | 15.45 | 4.13  | 775  | 210 | 565  | 0  |
| 89  | Cherry tree_e | 4.3 | 63.33 | 2.0 | 54.3 | 12.0 | 12.0 | 0.0 | 10.0 | 42.3 | 16.49 | 6.82  | 934  | 273 | 661  | 0  |
| 90  | Framboise_f   | 4.1 | 76.67 | 2.0 | 56.7 | 12.3 | 12.3 | 0.0 | 10.3 | 44.3 | 15.60 | 11.10 | 1144 | 337 | 806  | 0  |
| 91  | Kyoho grape_f | 4.1 | 57.67 | 2.0 | 80.7 | 12.3 | 12.7 | 0.3 | 10.3 | 68.0 | 14.37 | 5.74  | 1304 | 247 | 1037 | 19 |
| 92  | Apple_e       | 4.1 | 68.33 | 2.0 | 50.0 | 12.7 | 13.0 | 0.3 | 10.7 | 37.0 | 10.16 | 5.02  | 1160 | 326 | 811  | 23 |
| 93  | Lemon_f       | 4.0 | 77.33 | 2.0 | 59.7 | 12.7 | 12.7 | 0.0 | 10.7 | 47.0 | 20.67 | 4.15  | 1380 | 353 | 1026 | 0  |
| 94  | Lemon_e       | 3.7 | 87.33 | 2.0 | 52.7 | 12.7 | 12.7 | 0.0 | 10.7 | 40.0 | 18.36 | 7.14  | 1347 | 353 | 994  | 0  |
| 95  | White peach_e | 3.7 | 49.33 | 2.0 | 31.7 | 11.7 | 12.0 | 0.3 | 9.7  | 19.7 | 15.06 | 6.13  | 551  | 183 | 352  | 16 |
| 96  | Sudachi_f     | 3.6 | 83.67 | 2.0 | 58.3 | 11.3 | 11.3 | 0.0 | 9.3  | 47.0 | 27.93 | 5.16  | 1438 | 298 | 1140 | 0  |
| 97  | Kabosu_f      | 3.6 | 77.67 | 2.0 | 65.7 | 13.3 | 13.7 | 0.3 | 11.3 | 52.0 | 13.61 | 4.42  | 1419 | 314 | 1079 | 26 |
| 98  | Apple_o       | 3.6 | 70.67 | 2.0 | 72.7 | 18.3 | 19.0 | 0.7 | 16.3 | 53.7 | 10.30 | 1.52  | 2381 | 558 | 1775 | 47 |
| 99  | Raspberry_o   | 3.5 | 59.00 | 2.3 | 48.0 | 11.7 | 11.7 | 0.0 | 9.3  | 36.3 | 18.01 | 6.45  | 775  | 221 | 554  | 0  |
| 100 | Cocoa_e       | 1.2 | 84.00 | 1.7 | 67.7 | 12.0 | 12.7 | 0.7 | 10.3 | 55.0 | 31.04 | 4.72  | 1815 | 367 | 1392 | 56 |

**Table S3.** List of the 100 food-flavoring materials arranged in descending order for each of the eight TI parameters.

| A) Tstart            |     | B) Imax                      |      | C) AreaInc                   |       | D) DurInc                    |      | E) SIMInc            |       | F) AreaDec                   |      | G) DurDec                    |       | H) SIMDec           |       |
|----------------------|-----|------------------------------|------|------------------------------|-------|------------------------------|------|----------------------|-------|------------------------------|------|------------------------------|-------|---------------------|-------|
| Coconut_f            | 2.7 | Cherry_o                     | 99.0 | Maple_f                      | 109.7 | Satsuma mandarin essential_o | 21.3 | Peppermint_o         | 44.62 | Rose_o                       | 2913 | Maple_f                      | 109.7 | Liche_e             | 16.19 |
| Vanilla_e            | 2.7 | Peppermint_o                 | 99.0 | Plum_f                       | 97.7  | Yuzu essential_o             | 18.3 | Apricot_f            | 37.40 | Satsuma mandarin essential_o | 2859 | Plum_f                       | 97.7  | Melon_e             | 13.44 |
| Yuzu_f               | 2.3 | Herb_f                       | 98.7 | Rose_o                       | 90.3  | Coconut_o                    | 18.0 | Muscat_e             | 31.48 | Cherry_o                     | 2754 | Rose_o                       | 90.3  | Cranberry_e         | 12.72 |
| Roasted green tea_f  | 2.3 | Rose_o                       | 97.7 | Matcha_e                     | 87.7  | Orange essential_o           | 18.0 | Pineapple_f          | 31.17 | Maple_f                      | 2600 | Matcha_e                     | 87.7  | Pineapple_f         | 11.21 |
| Peach_f              | 2.3 | Orange essential_o           | 97.0 | Passionfruit_f               | 81.7  | Orange_o                     | 17.0 | Cocoa_e              | 31.04 | Herb_f                       | 2514 | Passionfruit_f               | 81.7  | Framboise_f         | 11.10 |
| Chocolate_f          | 2.3 | Spearmint_e                  | 95.7 | Melon_o                      | 81.3  | Apple_o                      | 16.3 | Muscat_o             | 28.45 | Orange essential_o           | 2472 | Melon_o                      | 81.3  | Herb_f              | 10.18 |
| Peppermint_f         | 2.3 | Maple_f                      | 95.0 | Orange essential_o           | 80.3  | Banana_o                     | 15.3 | Sudachi_f            | 27.93 | Plum_f                       | 2355 | Orange essential_o           | 80.3  | Cheese_e            | 8.43  |
| Coffee_f             | 2.3 | Melon_f                      | 93.0 | Coconut_f                    | 79.3  | Orange_e                     | 14.0 | Cinnamon_o           | 27.87 | Custard_f                    | 2339 | Coconut_f                    | 79.3  | Melon_f             | 8.38  |
| Custard_f            | 2.3 | Mango_o                      | 93.0 | Custard_f                    | 79.3  | Cherry_o                     | 13.7 | Cranberry_e          | 27.70 | Matcha_e                     | 2007 | Custard_f                    | 79.3  | Roasted green tea_f | 7.50  |
| Matcha_f             | 2.3 | Yogurt_f                     | 92.0 | Satsuma mandarin essential_o | 79.0  | Rose_o                       | 13.3 | Hazelnut_o           | 26.46 | Coconut_f                    | 1912 | Satsuma mandarin essential_o | 79.0  | Honey_e             | 7.46  |
| Pineapple_e          | 2.3 | Cheese_o                     | 91.7 | Herb_f                       | 78.7  | Kiwifruit_e                  | 13.0 | Chocolate_e          | 25.96 | Melon_o                      | 1848 | Herb_f                       | 78.7  | Lemon_e             | 7.14  |
| Muscat_e             | 2.3 | Liche_f                      | 90.3 | Coffee_f                     | 77.0  | Melon_o                      | 13.0 | Liche_f              | 25.76 | Coffee_f                     | 1779 | Coffee_f                     | 77.0  | Tea_o               | 7.12  |
| Honey_e              | 2.3 | Satsuma mandarin essential_o | 89.0 | Brown sugar_e                | 73.3  | Mango_o                      | 13.0 | Roasted green tea_f  | 25.40 | Apple_o                      | 1775 | Brown sugar_e                | 73.3  | Cherry tree_e       | 6.82  |
| Peach_o              | 2.3 | Lemon_e                      | 87.3 | Banana_e                     | 72.3  | Plum_o                       | 13.0 | Apricot_e            | 25.18 | Pineapple_o                  | 1763 | Banana_e                     | 72.3  | Cheese_o            | 6.75  |
| Vanilla_o            | 2.3 | Cranberry_e                  | 87.0 | European pear_o              | 72.3  | Strawberry_o                 | 13.0 | Baked sweet potato_f | 24.94 | Mango_o                      | 1754 | European pear_o              | 72.3  | Cinnamon_o          | 6.69  |
| Orange_o             | 2.3 | Muscat_e                     | 87.0 | Melon_f                      | 71.3  | Soda pop_o                   | 12.7 | Peanut_f             | 24.91 | Yogurt_f                     | 1733 | Melon_f                      | 71.3  | Muscat_e            | 6.67  |
| Raspberry_o          | 2.3 | Liche_e                      | 86.7 | Cocoa_f                      | 71.0  | Yogurt_f                     | 12.3 | Tea_e                | 24.71 | European pear_o              | 1722 | Cocoa_f                      | 71.0  | Raspberry_o         | 6.45  |
| Melon_f              | 2.0 | Peanut_f                     | 85.7 | Cherry_o                     | 71.0  | European pear_o              | 12.0 | Liche_e              | 24.36 | Banana_e                     | 1684 | Cherry_o                     | 71.0  | White peach_f       | 6.34  |
| Pineapple_f          | 2.0 | Roasted green tea_f          | 85.0 | Matcha_f                     | 70.0  | Vanilla_o                    | 12.0 | Almond_o             | 22.73 | Peppermint_o                 | 1672 | Matcha_f                     | 70.0  | Pineapple_e         | 6.20  |
| Lemon_f              | 2.0 | Almond_o                     | 85.0 | Muscat_e                     | 70.0  | Almond_o                     | 12.0 | Spearmint_f          | 22.51 | Almond_o                     | 1665 | Muscat_e                     | 70.0  | Mango_o             | 6.16  |
| Sudachi_f            | 2.0 | Apricot_e                    | 84.3 | Pineapple_o                  | 69.7  | Kiwifruit_o                  | 12.0 | Maple_f              | 22.40 | Grapefruit_e                 | 1625 | Pineapple_o                  | 69.7  | White peach_e       | 6.13  |
| White peach_f        | 2.0 | Cocoa_e                      | 84.0 | Kyoho grape_f                | 68.0  | Cola_o                       | 12.0 | Rose_e               | 21.93 | Passionfruit_f               | 1567 | Kyoho grape_f                | 68.0  | Caramel_e           | 5.94  |
| Kabosu_f             | 2.0 | Sudachi_f                    | 83.7 | Mango_o                      | 66.7  | Peppermint_f                 | 11.7 | Cheese_o             | 21.93 | Muscat_e                     | 1558 | Mango_o                      | 66.7  | Liche_f             | 5.93  |
| Herb_f               | 2.0 | Plum_f                       | 83.7 | Muscat_f                     | 66.0  | Cola_f                       | 11.7 | Cherry_o             | 21.80 | Melon_f                      | 1541 | Muscat_f                     | 66.0  | Tea_e               | 5.90  |
| Plum_f               | 2.0 | Grapefruit_e                 | 83.3 | Peanut_f                     | 65.0  | Chestnut_e                   | 11.7 | Coconut_f            | 21.48 | Muscat_f                     | 1514 | Peanut_f                     | 65.0  | Kyoho grape_f       | 5.74  |
| Liche_f              | 2.0 | Melon_e                      | 82.7 | Coconut_o                    | 64.7  | Yogurt_o                     | 11.7 | Blueberry_e          | 21.23 | Peanut_f                     | 1505 | Coconut_o                    | 64.7  | Blueberry_e         | 5.60  |
| Framboise_f          | 2.0 | Tea_e                        | 82.0 | Mango_e                      | 64.5  | Mango_e                      | 11.5 | Cheese_e             | 21.16 | Orange_o                     | 1496 | Mango_e                      | 64.5  | Spearmint_e         | 5.47  |
| Yogurt_f             | 2.0 | Cinnamon_o                   | 82.0 | Orange_o                     | 64.3  | Kabosu_f                     | 11.3 | Kiwifruit_o          | 20.81 | Liche_f                      | 1484 | Orange_o                     | 64.3  | Hazelnut_o          | 5.35  |
| Baked sweet potato_f | 2.0 | Spearmint_f                  | 81.3 | Vanilla_f                    | 63.0  | Roasted green tea_f          | 11.3 | Raspberry_e          | 20.75 | Cocoa_f                      | 1463 | Vanilla_f                    | 63.0  | Kyoho grape_e       | 5.28  |
| Vanilla_f            | 2.0 | Muscat_f                     | 81.0 | Kiwifruit_e                  | 62.7  | Maple_f                      | 11.3 | Lemon_f              | 20.67 | Cheese_o                     | 1445 | Kiwifruit_e                  | 62.7  | Rose_e              | 5.24  |
| Cocoa_f              | 2.0 | Pineapple_f                  | 80.3 | Yogurt_f                     | 62.0  | Melon_f                      | 11.0 | Liche_o              | 20.17 | Muscat_o                     | 1416 | Yogurt_f                     | 62.0  | Liche_o             | 5.23  |
| Muscat_f             | 2.0 | Vanilla_o                    | 79.3 | Muscat_o                     | 61.7  | Muscat_f                     | 11.0 | European pear_o      | 19.99 | Vanilla_o                    | 1406 | Muscat_o                     | 61.7  | Sudachi_f           | 5.16  |
| Peanut_f             | 2.0 | Muscat_o                     | 79.3 | Soda pop_o                   | 61.7  | Coffee_f                     | 11.0 | Grapefruit_e         | 19.73 | Coconut_o                    | 1404 | Soda pop_o                   | 61.7  | Caramel_o           | 5.15  |

|                 |     |                      |      |                      |      |                      |      |                    |       |                      |      |                      |      |                      |      |
|-----------------|-----|----------------------|------|----------------------|------|----------------------|------|--------------------|-------|----------------------|------|----------------------|------|----------------------|------|
| Apricot_f       | 2.0 | Coconut_o            | 79.0 | Tea_o                | 61.0 | Spearmint_e          | 11.0 | Mango_e            | 19.61 | Cocoa_e              | 1392 | Tea_o                | 61.0 | Yogurt_f             | 5.14 |
| Maple_f         | 2.0 | Banana_e             | 78.7 | Cheese_o             | 59.3 | Cranberry_e          | 11.0 | Cinnamon_e         | 19.46 | Tea_e                | 1391 | Cheese_o             | 59.3 | Apple_e              | 5.02 |
| Cola_f          | 2.0 | Yuzu essential_o     | 78.7 | Plum_o               | 59.3 | Apricot_e            | 11.0 | Banana_e           | 19.44 | Vanilla_f            | 1377 | Plum_o               | 59.3 | Rose_o               | 5.02 |
| Mixed fruit_f   | 2.0 | Kabosu_f             | 77.7 | Cola_f               | 59.0 | Cinnamon_e           | 11.0 | Honey_f            | 19.42 | Kiwifruit_e          | 1372 | Cola_f               | 59.0 | Spearmint_f          | 5.00 |
| Kyoho grape_f   | 2.0 | Lemon_f              | 77.3 | Tea_e                | 59.0 | Liche_o              | 11.0 | Orange essential_o | 19.39 | Plum_o               | 1346 | Tea_e                | 59.0 | Apricot_f            | 4.93 |
| Honey_f         | 2.0 | Coconut_f            | 77.0 | Kyoho grape_e        | 58.7 | Lemon_f              | 10.7 | Orange_o           | 19.30 | Mango_e              | 1312 | Kyoho grape_e        | 58.7 | Apricot_e            | 4.85 |
| Brown sugar_f   | 2.0 | Framboise_f          | 76.7 | Liche_o              | 58.0 | Cocoa_f              | 10.7 | Chocolate_f        | 19.26 | Spearmint_e          | 1311 | Liche_o              | 58.0 | Strawberry_e         | 4.84 |
| Passionfruit_f  | 2.0 | Orange_o             | 76.7 | Spearmint_f          | 57.7 | Peach_f              | 10.7 | Matcha_e           | 19.22 | Yuzu essential_o     | 1307 | Spearmint_f          | 57.7 | Yuzu_f               | 4.79 |
| Lemon_e         | 2.0 | Apricot_f            | 76.0 | Guava_o              | 57.7 | Brown sugar_f        | 10.7 | Vanilla_o          | 19.12 | Roasted green tea_f  | 1306 | Guava_o              | 57.7 | Cocoa_e              | 4.72 |
| Banana_e        | 2.0 | Cheese_e             | 76.0 | Yogurt_o             | 57.0 | Passionfruit_f       | 10.7 | Vanilla_f          | 18.99 | Apricot_e            | 1271 | Yogurt_o             | 57.0 | Cinnamon_e           | 4.72 |
| Orange_e        | 2.0 | Cocoa_f              | 75.3 | Caramel_o            | 56.7 | Lemon_e              | 10.7 | Plum_f             | 18.97 | Kiwifruit_o          | 1268 | Caramel_o            | 56.7 | Yuzu essential_o     | 4.67 |
| White peach_e   | 2.0 | Pineapple_o          | 75.3 | Almond_o             | 56.7 | Liche_e              | 10.7 | Honey_e            | 18.58 | Spearmint_f          | 1243 | Almond_o             | 56.7 | Banana_o             | 4.64 |
| Kyoho grape_e   | 2.0 | Yuzu_f               | 75.0 | Banana_o             | 56.0 | Pineapple_e          | 10.7 | Custard_f          | 18.43 | Cola_o               | 1226 | Banana_o             | 56.0 | Baked sweet potato_f | 4.63 |
| Liche_e         | 2.0 | Vanilla_f            | 74.0 | Cola_o               | 55.7 | Apple_e              | 10.7 | Coconut_o          | 18.41 | Brown sugar_e        | 1213 | Cola_o               | 55.7 | Vanilla_o            | 4.48 |
| Spearmint_e     | 2.0 | Mango_e              | 74.0 | Blueberry_o          | 55.3 | Chocolate_e          | 10.7 | Lemon_e            | 18.36 | Matcha_f             | 1208 | Blueberry_o          | 55.3 | Kabosu_f             | 4.42 |
| Cranberry_e     | 2.0 | Matcha_e             | 73.0 | Cocoa_e              | 55.0 | Tea_e                | 10.7 | Passionfruit_f     | 18.34 | Guava_o              | 1184 | Cocoa_e              | 55.0 | Vanilla_f            | 4.33 |
| Strawberry_e    | 2.0 | Matcha_f             | 72.7 | Liche_f              | 54.7 | Grapefruit_e         | 10.7 | Yuzu_f             | 18.30 | Chocolate_e          | 1174 | Liche_f              | 54.7 | Mango_e              | 4.33 |
| Kiwifruit_e     | 2.0 | Kiwifruit_e          | 72.3 | Chocolate_f          | 54.3 | Pineapple_o          | 10.7 | Matcha_f           | 18.17 | Soda pop_o           | 1169 | Chocolate_f          | 54.3 | Chestnut_e           | 4.18 |
| Apple_e         | 2.0 | Cinnamon_e           | 72.3 | Roasted green tea_f  | 54.0 | Spearmint_f          | 10.3 | Coffee_f           | 18.08 | Yogurt_o             | 1162 | Roasted green tea_f  | 54.0 | Lemon_f              | 4.15 |
| Caramel_e       | 2.0 | Kiwifruit_o          | 72.3 | Apple_o              | 53.7 | Framboise_f          | 10.3 | Raspberry_o        | 18.01 | Liche_o              | 1146 | Apple_o              | 53.7 | Coconut_o            | 4.14 |
| Blueberry_e     | 2.0 | Hazelnut_o           | 72.0 | Yuzu essential_o     | 52.3 | Vanilla_f            | 10.3 | Mango_o            | 17.98 | Sudachi_f            | 1140 | Yuzu essential_o     | 52.3 | Orange essential_o   | 4.14 |
| Raspberry_e     | 2.0 | Chestnut_e           | 71.3 | Kabosu_f             | 52.0 | Kyoho grape_f        | 10.3 | Herb_f             | 17.63 | Raspberry_e          | 1106 | Kabosu_f             | 52.0 | Brown sugar_f        | 4.13 |
| Chocolate_e     | 2.0 | Kyoho grape_e        | 70.7 | Raspberry_e          | 52.0 | Melon_e              | 10.3 | Brown sugar_e      | 17.61 | Caramel_o            | 1100 | Raspberry_e          | 52.0 | Blueberry_o          | 4.11 |
| Tea_e           | 2.0 | Apple_o              | 70.7 | Grapefruit_e         | 51.7 | Kyoho grape_e        | 10.3 | Tea_o              | 16.98 | Chocolate_f          | 1085 | Grapefruit_e         | 51.7 | Peppermint_o         | 4.05 |
| Chestnut_e      | 2.0 | Coffee_f             | 70.3 | Cinnamon_o           | 51.7 | Strawberry_e         | 10.3 | Rose_o             | 16.58 | Kabosu_f             | 1079 | Cinnamon_o           | 51.7 | Muscat_o             | 3.98 |
| Cheese_e        | 2.0 | Melon_o              | 70.0 | Chocolate_e          | 50.7 | Caramel_e            | 10.3 | Cherry tree_e      | 16.49 | Kyoho grape_e        | 1075 | Chocolate_e          | 50.7 | Matcha_f             | 3.90 |
| Grapefruit_e    | 2.0 | Yogurt_o             | 69.0 | Apricot_e            | 50.7 | Raspberry_e          | 10.3 | Yogurt_o           | 16.39 | Chestnut_e           | 1074 | Apricot_e            | 50.7 | Plum_f               | 3.81 |
| Brown sugar_e   | 2.0 | Liche_o              | 68.7 | Peppermint_o         | 50.7 | Cocoa_e              | 10.3 | Melon_e            | 16.35 | Peppermint_f         | 1056 | Peppermint_o         | 50.7 | Muscat_f             | 3.79 |
| Cinnamon_e      | 2.0 | Apple_e              | 68.3 | Melon_e              | 50.3 | Lime_e               | 10.3 | Yogurt_f           | 16.30 | Cinnamon_o           | 1047 | Melon_e              | 50.3 | Chocolate_f          | 3.66 |
| Lime_e          | 2.0 | Caramel_o            | 68.0 | Kiwifruit_o          | 49.0 | Vanilla_e            | 10.3 | Cocoa_f            | 16.28 | Kyoho grape_f        | 1037 | Kiwifruit_o          | 49.0 | Brown sugar_e        | 3.66 |
| Rose_e          | 2.0 | Custard_f            | 67.7 | Peach_o              | 48.0 | Peach_o              | 10.3 | Melon_f            | 16.20 | Banana_o             | 1030 | Peach_o              | 48.0 | Peanut_f             | 3.60 |
| Cherry tree_e   | 2.0 | European pear_o      | 67.7 | Vanilla_e            | 47.7 | Guava_o              | 10.3 | Pineapple_o        | 15.99 | Lemon_f              | 1026 | Vanilla_e            | 47.7 | Honey_f              | 3.56 |
| Matcha_e        | 2.0 | Chocolate_e          | 67.3 | Lemon_f              | 47.0 | Tea_o                | 10.3 | Chestnut_e         | 15.90 | Apricot_f            | 1010 | Lemon_f              | 47.0 | Orange_o             | 3.51 |
| Melon_o         | 2.0 | Strawberry_e         | 66.7 | Sudachi_f            | 47.0 | White peach_f        | 10.0 | Kyoho grape_e      | 15.82 | Lemon_e              | 994  | Sudachi_f            | 47.0 | Cola_f               | 3.42 |
| Liche_o         | 2.0 | Peppermint_f         | 66.3 | Baked sweet potato_f | 46.7 | Yuzu_f               | 10.0 | Caramel_o          | 15.77 | Yuzu_f               | 960  | Baked sweet potato_f | 46.7 | Peppermint_f         | 3.36 |
| European pear_o | 2.0 | Baked sweet potato_f | 65.7 | Vanilla_o            | 46.7 | Coconut_f            | 10.0 | Peppermint_f       | 15.63 | Cola_f               | 915  | Vanilla_o            | 46.7 | Melon_o              | 3.34 |
| Caramel_o       | 2.0 | Chocolate_f          | 65.7 | Apricot_f            | 45.7 | Baked sweet potato_f | 10.0 | Framboise_f        | 15.60 | Tea_o                | 903  | Apricot_f            | 45.7 | Yogurt_o             | 3.34 |
| Mango_o         | 2.0 | Guava_o              | 65.7 | Framboise_f          | 44.3 | Apricot_f            | 10.0 | Lime_e             | 15.59 | Peach_f              | 880  | Framboise_f          | 44.3 | Mixed fruit_f        | 3.30 |
| Coconut_o       | 2.0 | Raspberry_e          | 64.3 | Peach_f              | 43.3 | Custard_f            | 10.0 | Brown sugar_f      | 15.45 | Strawberry_o         | 858  | Peach_f              | 43.3 | Kiwifruit_e          | 3.28 |
| Cheese_o        | 2.0 | Tea_o                | 64.3 | Strawberry_e         | 42.3 | Banana_e             | 10.0 | Mixed fruit_f      | 15.14 | Peach_o              | 853  | Strawberry_e         | 42.3 | Pineapple_o          | 3.28 |
| Plum_o          | 2.0 | Cherry tree_e        | 63.3 | Cherry tree_e        | 42.3 | Blueberry_e          | 10.0 | Strawberry_e       | 15.09 | Baked sweet potato_f | 839  | Cherry tree_e        | 42.3 | Raspberry_e          | 3.25 |
| Strawberry_o    | 2.0 | Plum_o               | 63.3 | Chestnut_e           | 41.7 | Brown sugar_e        | 10.0 | White peach_e      | 15.06 | Liche_e              | 836  | Chestnut_e           | 41.7 | Coffee_f             | 3.23 |
| Banana_o        | 2.0 | Passionfruit_f       | 63.0 | Rose_e               | 41.7 | Cherry tree_e        | 10.0 | Cola_f             | 14.74 | Vanilla_e            | 835  | Rose_e               | 41.7 | Cherry_o             | 3.19 |

|                              |     |               |      |               |      |               |      |                              |       |               |     |               |      |                              |      |
|------------------------------|-----|---------------|------|---------------|------|---------------|------|------------------------------|-------|---------------|-----|---------------|------|------------------------------|------|
| Apple_o                      | 2.0 | Blueberry_e   | 63.0 | Mixed fruit_f | 41.3 | Matcha_e      | 10.0 | Pineapple_e                  | 14.56 | Cinnamon_e    | 832 | Mixed fruit_f | 41.3 | Matcha_e                     | 3.15 |
| Pineapple_o                  | 2.0 | Banana_o      | 62.7 | Peppermint_f  | 40.3 | Blueberry_o   | 10.0 | Melon_o                      | 14.55 | Blueberry_o   | 829 | Peppermint_f  | 40.3 | Banana_e                     | 3.04 |
| Muscat_o                     | 2.0 | Cola_f        | 60.7 | Honey_f       | 40.3 | Plum_f        | 9.7  | Kyoho grape_f                | 14.37 | Strawberry_e  | 814 | Honey_f       | 40.3 | Cola_o                       | 3.03 |
| Cherry_o                     | 2.0 | Rose_e        | 60.7 | Yuzu_f        | 40.0 | Peanut_f      | 9.7  | Muscat_f                     | 13.91 | Apple_e       | 811 | Yuzu_f        | 40.0 | Plum_o                       | 3.01 |
| Kiwifruit_o                  | 2.0 | Cola_o        | 60.0 | Lemon_e       | 40.0 | Chocolate_f   | 9.7  | Caramel_e                    | 13.85 | Framboise_f   | 806 | Lemon_e       | 40.0 | Kiwifruit_o                  | 2.98 |
| Cola_o                       | 2.0 | Soda pop_o    | 59.7 | Spearmint_e   | 39.7 | Mixed fruit_f | 9.7  | Kiwifruit_e                  | 13.82 | Melon_e       | 797 | Spearmint_e   | 39.7 | Grapefruit_e                 | 2.97 |
| Blueberry_o                  | 2.0 | Brown sugar_e | 59.3 | Strawberry_o  | 38.0 | White peach_e | 9.7  | Kabosu_f                     | 13.61 | Mixed fruit_f | 761 | Strawberry_o  | 38.0 | Soda pop_o                   | 2.97 |
| Hazelnut_o                   | 2.0 | Pineapple_e   | 59.0 | Liche_e       | 37.3 | Muscat_e      | 9.7  | Peach_f                      | 12.52 | Hazelnut_o    | 734 | Liche_e       | 37.3 | Orange_e                     | 2.94 |
| Cinnamon_o                   | 2.0 | Raspberry_o   | 59.0 | Apple_e       | 37.0 | Cheese_o      | 9.7  | White peach_f                | 12.07 | Rose_e        | 713 | Apple_e       | 37.0 | Maple_f                      | 2.93 |
| Yogurt_o                     | 2.0 | Kyoho grape_f | 57.7 | Brown sugar_f | 36.7 | Cinnamon_o    | 9.7  | Blueberry_o                  | 11.92 | Blueberry_e   | 695 | Brown sugar_f | 36.7 | Lime_e                       | 2.82 |
| Peppermint_o                 | 2.0 | White peach_f | 57.0 | Blueberry_e   | 36.3 | Peppermint_o  | 9.7  | Guava_o                      | 11.92 | Cranberry_e   | 693 | Blueberry_e   | 36.3 | Almond_o                     | 2.74 |
| Guava_o                      | 2.0 | Mixed fruit_f | 57.0 | Raspberry_o   | 36.3 | Pineapple_f   | 9.3  | Spearmint_e                  | 11.48 | Cherry tree_e | 661 | Raspberry_o   | 36.3 | Cocoa_f                      | 2.72 |
| Tea_o                        | 2.0 | Peach_f       | 56.0 | Hazelnut_o    | 34.0 | Sudachi_f     | 9.3  | Vanilla_e                    | 10.87 | Lime_e        | 646 | Hazelnut_o    | 34.0 | Peach_f                      | 2.71 |
| Rose_o                       | 2.0 | Caramel_e     | 56.0 | Lime_e        | 33.7 | Matcha_f      | 9.3  | Soda pop_o                   | 10.82 | Pineapple_f   | 630 | Lime_e        | 33.7 | Guava_o                      | 2.70 |
| Soda pop_o                   | 2.0 | Honey_e       | 55.0 | White peach_f | 33.3 | Cheese_e      | 9.3  | Banana_o                     | 10.38 | Orange_e      | 594 | White peach_f | 33.3 | Pear_o                       | 2.69 |
| Yuzu essential_o             | 2.0 | Blueberry_o   | 55.0 | Honey_e       | 33.0 | Rose_e        | 9.3  | Peach_o                      | 10.34 | Brown sugar_f | 565 | Honey_e       | 33.0 | Coconut_f                    | 2.68 |
| Orange essential_o           | 2.0 | Strawberry_o  | 54.0 | Cinnamon_e    | 31.7 | Caramel_o     | 9.3  | Apple_o                      | 10.30 | Raspberry_o   | 554 | Cinnamon_e    | 31.7 | Chocolate_e                  | 2.58 |
| Satsuma mandarin essential_o | 2.0 | Lime_e        | 52.3 | Pineapple_f   | 31.3 | Raspberry_o   | 9.3  | Plum_o                       | 10.18 | Cheese_e      | 552 | Pineapple_f   | 31.3 | Strawberry_o                 | 2.53 |
| Spearmint_f                  | 1.7 | Peach_o       | 50.7 | Orange_e      | 31.0 | Liche_f       | 9.0  | Apple_e                      | 10.16 | Honey_f       | 539 | Orange_e      | 31.0 | Peach_o                      | 2.34 |
| Melon_e                      | 1.7 | Honey_f       | 50.3 | Cranberry_e   | 25.7 | Muscat_o      | 9.0  | Cola_o                       | 8.96  | White peach_f | 515 | Cranberry_e   | 25.7 | Satsuma mandarin essential_o | 2.27 |
| Cocoa_e                      | 1.7 | Brown sugar_f | 49.7 | Caramel_e     | 25.7 | Honey_e       | 8.7  | Satsuma mandarin essential_o | 8.15  | Caramel_e     | 484 | Caramel_e     | 25.7 | Custard_f                    | 2.17 |
| Apricot_e                    | 1.7 | Orange_e      | 49.3 | Cheese_e      | 20.0 | Hazelnut_o    | 8.7  | Strawberry_o                 | 7.98  | Honey_e       | 414 | Cheese_e      | 20.0 | Passionfruit_f               | 1.96 |
| Almond_o                     | 1.7 | White peach_e | 49.3 | White peach_e | 19.7 | Herb_f        | 8.3  | Orange_e                     | 7.29  | Pineapple_e   | 380 | White peach_e | 19.7 | Vanilla_e                    | 1.70 |
| Mango_e                      | 1.5 | Vanilla_e     | 43.7 | Pineapple_e   | 18.7 | Honey_f       | 8.3  | Yuzu essential_o             | 6.04  | White peach_e | 352 | Pineapple_e   | 18.7 | Apple_o                      | 1.52 |

**Table S4.** Materials belonging to clusters 0 and 1.

| Materials          | masking score | cluster | Materials           | masking score | cluster | Materials            | masking score | cluster |
|--------------------|---------------|---------|---------------------|---------------|---------|----------------------|---------------|---------|
| Peppermint_o       | 9.9           | 0       | Cinnamon_o          | 9.9           | 1       | Peach_f              | 5.8           | 1       |
| Orange essential_o | 9.6           | 0       | Rose_e              | 9.2           | 1       | Chestnut_e           | 5.8           | 1       |
| Pineapple_o        | 9.3           | 0       | Pineapple_f         | 9.0           | 1       | Liche_o              | 5.7           | 1       |
| Yuzu essential_o   | 9.3           | 0       | Caramel_e           | 9.0           | 1       | Lime_e               | 5.4           | 1       |
| Coffee_f           | 9.2           | 0       | Cheese_e            | 9.0           | 1       | Baked sweet potato_f | 5.0           | 1       |
| Cheese_o           | 9.1           | 0       | Yogurt_o            | 8.9           | 1       | Chocolate_f          | 4.9           | 1       |
| Liche_f            | 8.8           | 0       | Strawberry_e        | 8.7           | 1       | Blueberry_o          | 4.8           | 1       |
| Matcha_e           | 8.7           | 0       | Brown sugar_e       | 8.7           | 1       | Chocolate_e          | 4.6           | 1       |
| Melon_f            | 8.5           | 0       | Caramel_o           | 8.7           | 1       | Mixed fruit_f        | 4.4           | 1       |
| Almond_o           | 8.5           | 0       | Hazelnut_o          | 8.7           | 1       | Brown sugar_f        | 4.4           | 1       |
| Yogurt_f           | 8.4           | 0       | Guava_o             | 8.7           | 1       | Cherry tree_e        | 4.3           | 1       |
| Tea_e              | 8.4           | 0       | Roasted green tea_f | 8.5           | 1       | Framboise_f          | 4.1           | 1       |
| Mango_e            | 8.1           | 0       | Matcha_f            | 8.2           | 1       | Kyoho grape_f        | 4.1           | 1       |
| Cola_o             | 8.1           | 0       | Honey_e             | 8.2           | 1       | Apple_e              | 4.1           | 1       |
| Orange_o           | 8.0           | 0       | Blueberry_e         | 8.1           | 1       | Lemon_f              | 4.0           | 1       |
| Spearmint_f        | 7.9           | 0       | Cola_f              | 7.9           | 1       | Lemon_e              | 3.7           | 1       |
| Muscat_f           | 7.9           | 0       | Orange_e            | 7.9           | 1       | White peach_e        | 3.7           | 1       |
| Grapefruit_e       | 7.9           | 0       | Kyoho grape_e       | 7.8           | 1       | Sudachi_f            | 3.6           | 1       |
| Melon_o            | 7.9           | 0       | Kiwifruit_e         | 7.5           | 1       | Kabosu_f             | 3.6           | 1       |
| Mango_o            | 7.8           | 0       | Peach_o             | 7.5           | 1       | Raspberry_o          | 3.5           | 1       |
| Coconut_o          | 7.8           | 0       | Tea_o               | 7.5           | 1       |                      |               |         |
| Kiwifruit_o        | 7.8           | 0       | White peach_f       | 7.2           | 1       |                      |               |         |
| Spearmint_e        | 7.7           | 0       | Banana_o            | 7.1           | 1       |                      |               |         |
| Vanilla_o          | 7.7           | 0       | Cranberry_e         | 7.0           | 1       |                      |               |         |
| Vanilla_f          | 7.3           | 0       | Raspberry_e         | 7.0           | 1       |                      |               |         |
| Apricot_e          | 7.3           | 0       | Melon_e             | 6.9           | 1       |                      |               |         |
| Muscat_e           | 7.1           | 0       | Vanilla_e           | 6.9           | 1       |                      |               |         |
| Muscat_o           | 6.9           | 0       | Apricot_f           | 6.8           | 1       |                      |               |         |
| Coconut_f          | 6.8           | 0       | Strawberry_o        | 6.8           | 1       |                      |               |         |
| Peanut_f           | 6.4           | 0       | Yuzu_f              | 6.7           | 1       |                      |               |         |
| European pear_o    | 6.3           | 0       | Peppermint_f        | 6.7           | 1       |                      |               |         |
| Plum_o             | 6.1           | 0       | Honey_f             | 6.6           | 1       |                      |               |         |
| Passionfruit_f     | 5.8           | 0       | Liche_e             | 6.6           | 1       |                      |               |         |
| Cocoa_f            | 5.2           | 0       | Pineapple_e         | 6.5           | 1       |                      |               |         |
| Apple_o            | 3.6           | 0       | Cinnamon_e          | 6.4           | 1       |                      |               |         |
| Cocoa_e            | 1.2           | 0       | Soda pop_o          | 5.9           | 1       |                      |               |         |
